# Supplementary material
Source: PubMed Central journal article supplement (PMC1978182)
Supplement: NIHMS13688-supplement-01.pdf [file NIHMS13688-supplement-01.pdf]

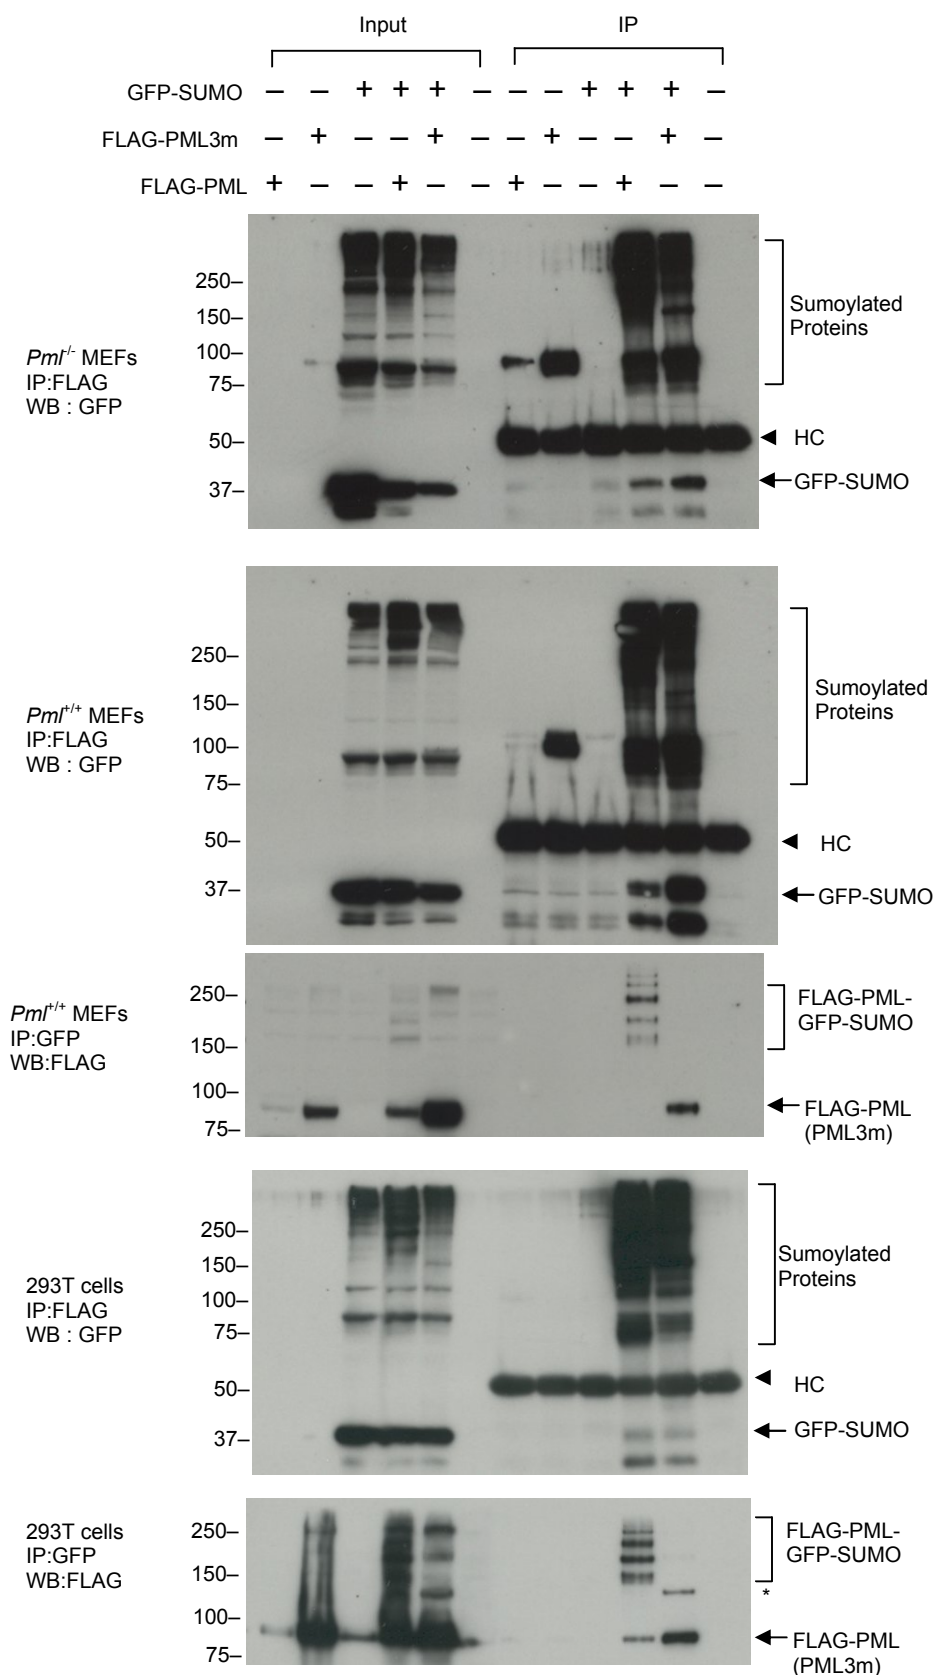

**Figure S1. SUMOylation Deficient PML Binds SUMO1.** *Pml*<sup>-/-</sup>, *Pml*<sup>+/+</sup> immortalized MEFs or 293T cells were transfected as indicated. Cell lysates were immunoprecipitated using anti-FLAG, or anti-GFP antibodies. The immunoprecipitates and 10% of the inputs used for immunoprecipitation were analyzed by Western blotting with anti-GFP or anti-FLAG antibodies. Asterisk (\*) indicates a cross-reacting band. HC: immunoglobulin heavy chains. Molecular weight markers (kDa) are indicated.

**A**

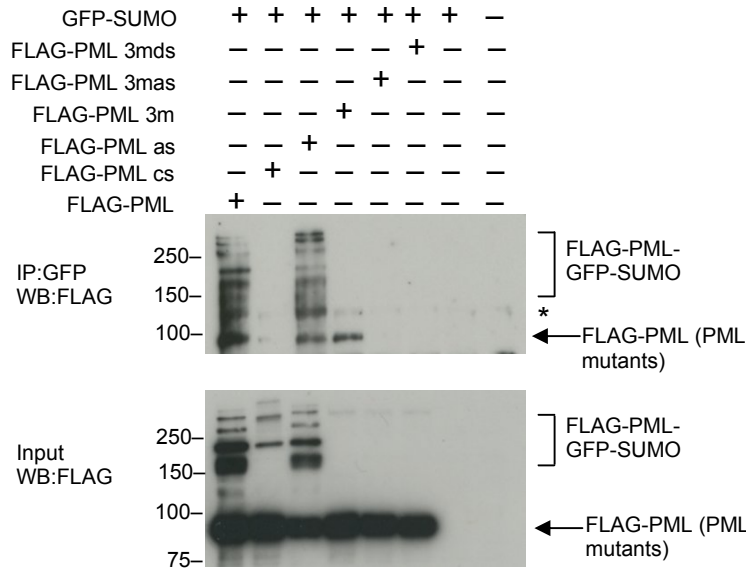

**B**

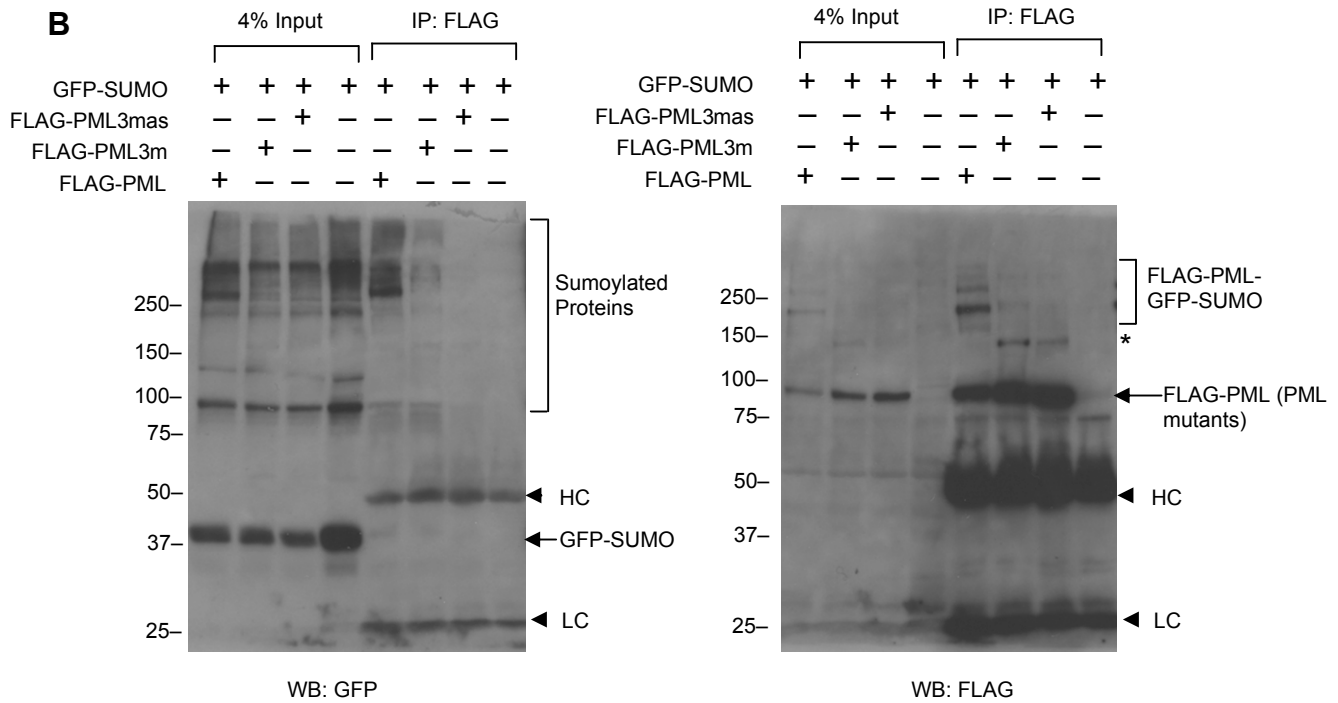

*Pml*<sup>-/-</sup> MEFs

**Figure S2. SUMOylation Deficient PML Has Decreased SUMO Binding Capacity When Its SUMO Binding Motif Is Mutated or Deleted.** (A) 293T cells were transfected as indicated. The immunoprecipitation and Western blot analysis were performed using anti-GFP and anti-FLAG antibodies, respectively (top panel). Ten percent of the inputs used for immunoprecipitation was also analyzed by Western blot (bottom panel). (B) *Pml*<sup>-/-</sup> immortalized MEFs were transfected as indicated. Cell lysates were immunoprecipitated with anti-FLAG antibodies. The immunoprecipitates and 4% of inputs used for immunoprecipitation were analyzed by Western blotting with antibodies against GFP (left panel) or FLAG (right panel). Asterisk (\*) indicates a cross-reacting band. Molecular weight markers (kDa) are indicated. HC: immunoglobulin heavy chains. LC: immunoglobulin light chains.

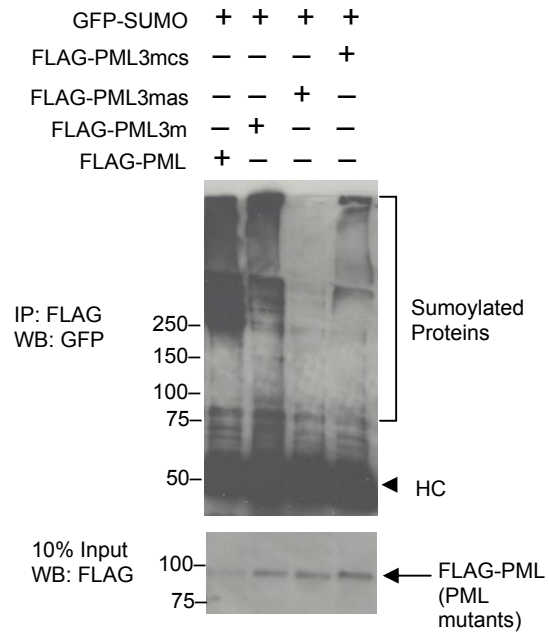

**Figure S3. A PML RING Domain Mutant Is Partially Impaired in Its Ability to Bind High Molecular Weight SUMOylated Proteins in vivo.** *Pml*<sup>-/-</sup> immortalized MEFs were transfected as indicated. Cell lysates were immunoprecipitated with anti-FLAG antibodies. The immunoprecipitates and 10% of inputs were analyzed by Western blot with antibodies against GFP (upper panel) or FLAG (lower panel). Molecular weight markers (kDa) are indicated. HC: immunoglobulin heavy chains.

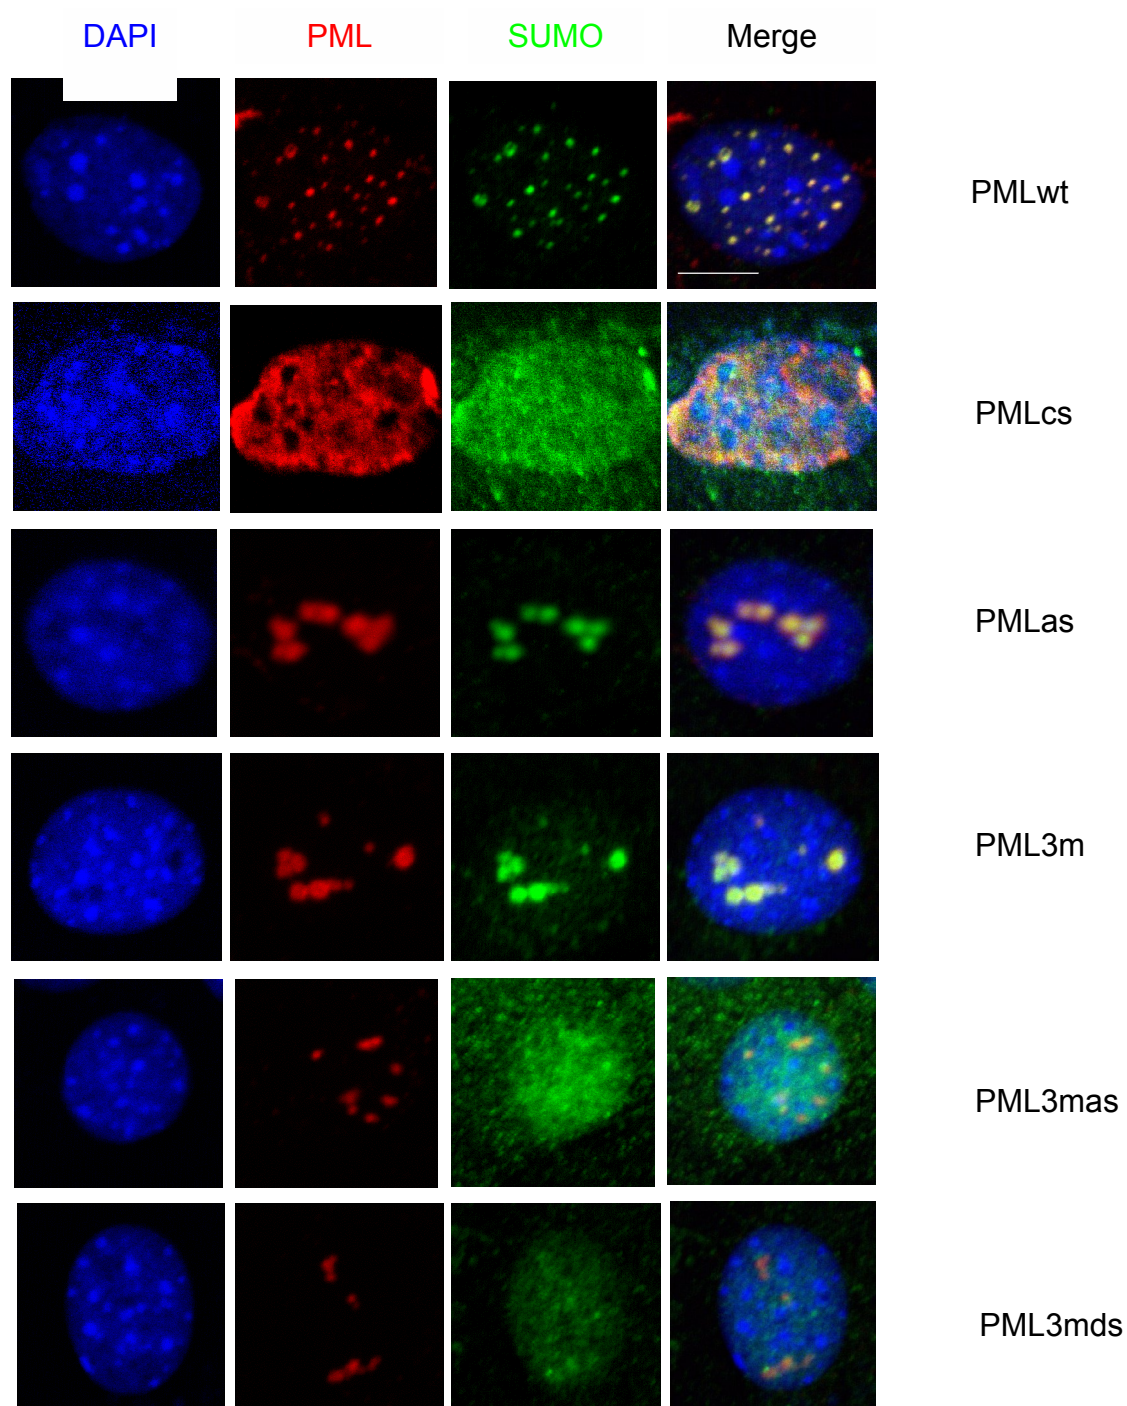

**Figure S4. PML RING Domain and SUMO Binding Motif Are Essential for PML-NB Formation as Revealed by Staining of Endogenous SUMO1.** *Pml*<sup>-/-</sup> immortalized MEFs were transfected with the indicated plasmids and analyzed by immunofluorescence. Representative confocal microscopy images are presented. Scale bar, 10  $\mu$ m.

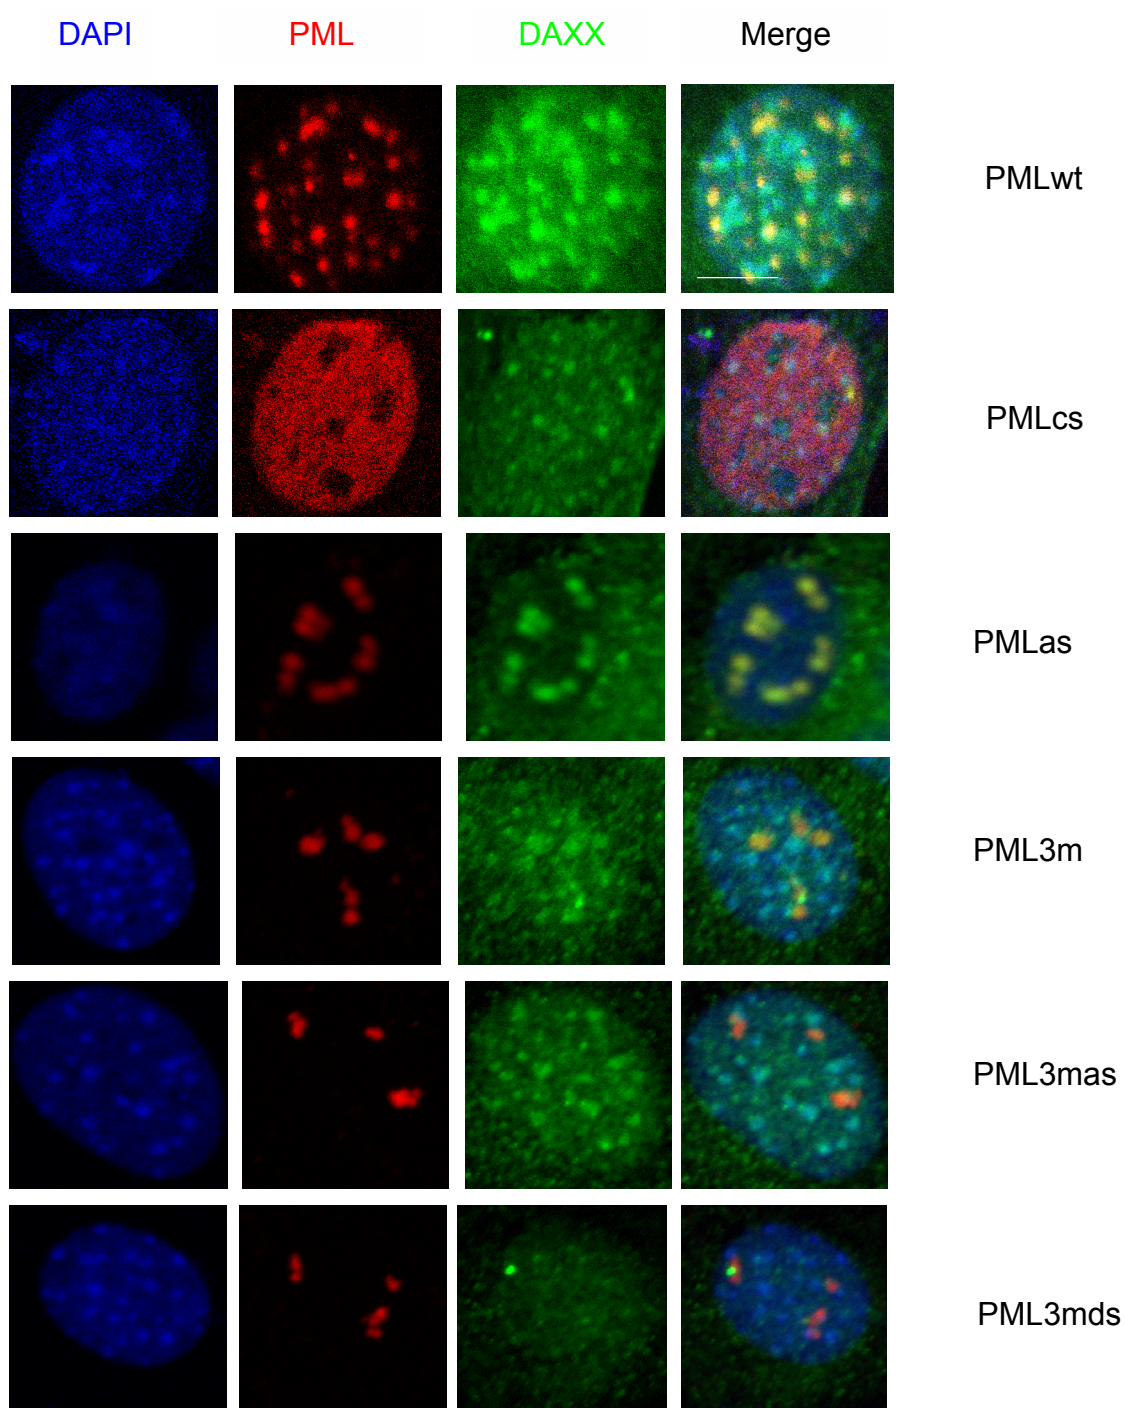

**Figure S5. PML RING Domain and SUMO Binding Motif Are Essential for PML-NB Formation as Revealed by Staining of Endogenous Daxx.** *Pml*<sup>-/-</sup> immortalized MEFs were transfected with the indicated plasmids and analyzed by immunofluorescence. Representative confocal microscopy images are presented. Scale bar, 10  $\mu$ m

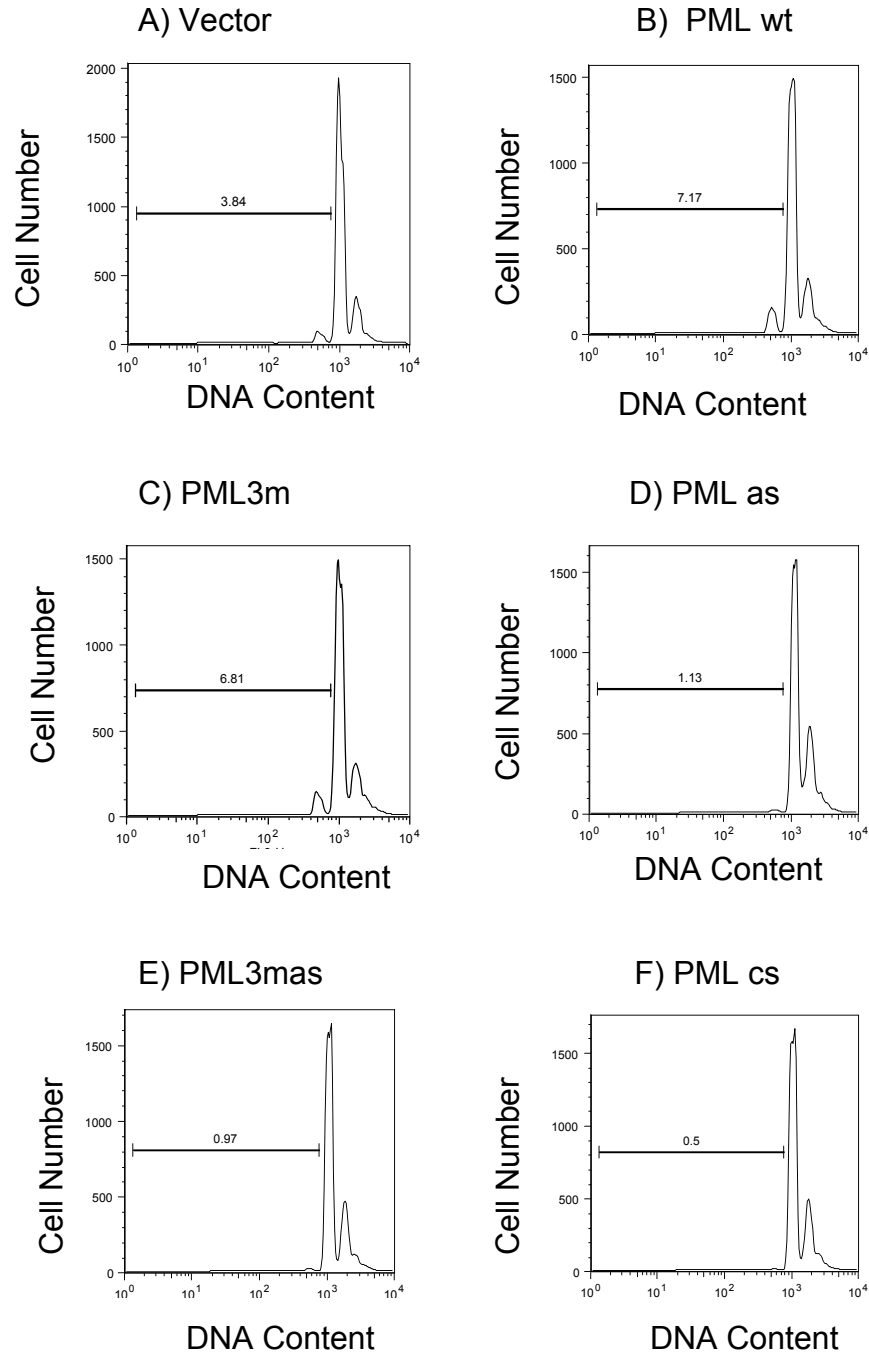

**Figure S6. The SUMO Binding Motif and RING Domain Are Required for PML Pro-apoptotic activity.** *Pml*<sup>-/-</sup> immortalized MEFs were infected with retroviruses expressing the indicated PML or its mutants. After drug selection, cells were subjected to PI staining and FACS analysis to quantify the sub-G1 population of cells.
